# Supplementary material for: Word learning and verbal working memory in children with developmental language disorder
Source: PubMed Central journal article supplement — Autism Dev Lang Impair. 2021 Mar 31;6:23969415211004109. doi: 10.1177/23969415211004109 (PMC9620694; doi:10.1177/23969415211004109), 2021-03-31
Supplement: sj-pdf-1-dli-10.1177_23969415211004109.pdf [file sj-pdf-1-dli-10.1177_23969415211004109.pdf]

## Supplemental Materials

### Statistical Analyses

**Table S1**

*Fixed Effects for the Nonverbal IQ Factor in the GLMMs for Naming, Recognition, Identification, and Description*

| Outcome measure | <i>F</i> | Degrees of freedom | <i>p</i> | <i>partial η</i> <sup>2</sup> |
|-----------------|----------|--------------------|----------|-------------------------------|
| Naming          | 0.15     | 1, 407             | .698     | < 0.01                        |
| Recognition     | 1.73     | 1, 407             | .190     | 0.004                         |
| Identification  | 5.71     | 1, 407             | .017*    | 0.01                          |
| Description     | 0.40     | 1, 407             | .525     | < 0.01                        |

*Note.* Nonverbal IQ assessed using the Primary Test of Nonverbal Intelligence (PTONI; Ehrler & McGhee, 2008).

\**p* < .05

**Table S2***Group Comparisons on Naming, Recognition, Identification, and Description Across the Four-day Protocol*

| Measure         | Day 1 (encoding) |          |                | Day 2 (re-encoding) |          |                | Day 3 (re-encoding) |          |                | Day 4 (retention) |          |                |
|-----------------|------------------|----------|----------------|---------------------|----------|----------------|---------------------|----------|----------------|-------------------|----------|----------------|
|                 | <i>t</i>         | <i>p</i> | 95% CI         | <i>t</i>            | <i>p</i> | 95% CI         | <i>t</i>            | <i>p</i> | 95% CI         | <i>t</i>          | <i>p</i> | 95% CI         |
| Naming          | -6.77            | < .001   | -32.85, -18.07 | -7.48               | < .001   | -35.31, -20.62 | -5.64               | < .001   | -28.65, -13.85 | -0.34             | .732     | -8.58, 6.03    |
| <i>Adjusted</i> | -8.68            | .044     | -17.11, -0.24  | -13.68              | .002     | -22.42, -4.94  | -6.47               | .103     | -14.27, 1.32   | 7.20              | .163     | -2.94, 17.34   |
| Recognition     | -6.97            | < .001   | -19.41, -10.87 | -8.53               | < .001   | -22.41, -14.02 | -6.64               | < .001   | -20.59, -11.18 | -6.87             | < .001   | -24.25, -13.46 |
| <i>Adjusted</i> | -8.32            | .002     | -13.68, -2.96  | -11.19              | < .001   | -15.77, -6.61  | -8.86               | .003     | -14.78, -2.94  | -10.99            | .001     | -17.63, -4.36  |
| Identification  | -1.77            | .078     | -8.34, 0.43    | -1.37               | .172     | -4.86, 0.87    | -0.33               | .741     | -2.62, 1.86    | -1.61             | .107     | -17.58, 1.73   |
| <i>Adjusted</i> | -4.09            | .102     | -9.00, 0.82    | -1.75               | .362     | -5.52, 2.02    | -0.06               | .971     | -3.33, 3.45    | -0.89             | .900     | -14.83, 13.04  |
| Description     | -3.40            | .001     | -16.41, -4.37  | -3.17               | .002     | -15.00, -3.50  | -3.94               | < .001   | -15.06, -5.03  | -                 | -        | -              |
| <i>Adjusted</i> | -7.38            | .047     | -14.67, -0.09  | -6.13               | .074     | -12.86, 0.60   | -5.39               | .318     | -12.52, 1.75   | -                 | -        | -              |

*Note.* Group comparisons are for the DLD to TD groups. Least significant difference contrasts are reported. 95% CI = 95% confidence interval (upper, lower).

All values indicate percentage of accuracy on the tasks. ‘Adjusted values’ are from the second set of GLMM analyses (controlling for nonverbal IQ and verbal working memory).

**Table S3***Comparisons Between Each Time Point on Naming, Recognition, Identification, and Description, Disaggregated by Group*

|                       | DLD      |                      |          |                      |               |              | TD       |                      |          |                      |               |                    |
|-----------------------|----------|----------------------|----------|----------------------|---------------|--------------|----------|----------------------|----------|----------------------|---------------|--------------------|
|                       | <i>t</i> | <i>t</i><br>adjusted | <i>p</i> | <i>p</i><br>adjusted | 95% CI        | 95% CI       | <i>t</i> | <i>t</i><br>adjusted | <i>p</i> | <i>p</i><br>adjusted | 95% CI        | 95% CI<br>adjusted |
| <b>Naming</b>         |          |                      |          |                      |               |              |          |                      |          |                      |               |                    |
| Day 1–Day 2           | -3.03    | -5.24                | .003     | .150                 | -11.82, -2.51 | -12.36, 1.89 | -5.23    | -10.24               | < .001   | .001                 | -13.31, -6.04 | -16.10, -4.38      |
| Day 2–Day 3           | -3.97    | -12.10               | < .001   | < .001               | -15.73, -5.31 | -19.03, 5.18 | -2.39    | -4.90                | .017     | .032                 | -6.94, -0.67  | -9.36, -0.44       |
| Day 3–Day 4           | 9.35     | 38.99                | < .001   | < .001               | 25.72, 39.41  | 29.42, 48.56 | 20.34    | 52.66                | < .001   | < .001               | 47.46, 57.62  | 43.20, 62.12       |
| <b>Recognition</b>    |          |                      |          |                      |               |              |          |                      |          |                      |               |                    |
| Day 1–Day 2           | -1.47    | -3.55                | .142     | .053                 | -5.39, 0.78   | -7.15, 0.05  | -5.78    | -6.41                | < .001   | < .001               | -7.21, -3.55  | -9.80, -3.03       |
| Day 2–Day 3           | -3.43    | -5.55                | .001     | .006                 | -7.58, -2.06  | -9.48, -1.62 | -3.81    | -3.22                | < .001   | .001                 | -3.77, -1.21  | -5.17, -1.27       |
| Day 3–Day 4           | 4.45     | 5.74                 | < .001   | .009                 | 3.60, 9.29    | 1.44, 10.04  | 4.48     | 3.61                 | < .001   | .010                 | 1.95, 5.00    | 0.86, 6.36         |
| <b>Identification</b> |          |                      |          |                      |               |              |          |                      |          |                      |               |                    |
| Day 1–Day 2           | -0.89    | -2.00                | .376     | .294                 | -5.07, 1.92   | -5.74, 1.74  | 0.24     | 0.34                 | .808     | .855                 | -1.64, 2.11   | -3.33, 4.02        |
| Day 2–Day 3           | -1.72    | -2.57                | .087     | .095                 | -4.57, 0.31   | -5.58, 0.45  | -0.61    | -0.76                | .542     | .694                 | -2.16, 1.14   | -4.53, 3.02        |
| Day 3–Day 4           | 13.58    | 51.90                | < .001   | < .001               | 46.61, 62.38  | 40.82, 62.98 | 15.13    | 15.94                | < .001   | < .001               | 40.85, 53.05  | 41.18, 60.70       |
| <b>Description</b>    |          |                      |          |                      |               |              |          |                      |          |                      |               |                    |
| Day 1–Day 2           | -0.17    | -2.60                | .865     | .282                 | -4.17, 3.51   | -7.33, 2.14  | 0.52     | -1.34                | .605     | .580                 | -3.89, 2.27   | -6.11, 3.43        |
| Day 2–Day 3           | -1.99    | -3.85                | .047     | .132                 | -9.47, 1.06   | -8.86, 1.17  | -3.06    | -3.10                | .002     | .213                 | -7.67, -1.67  | -7.99, 1.79        |

*Note.* Least significant difference contrasts are reported. 95% CI = 95% confidence interval (upper, lower). All values indicate percentage of accuracy on the tasks. ‘Adjusted values’ are from the second set of GLMM analyses (controlling for nonverbal IQ and verbal working memory).

**Table S4***Confidence Intervals (95%; Upper, Lower) Indicating Between-Group Differences on Naming*

|       | DLDlow       | DLDav        | TDlow        | TDav         |
|-------|--------------|--------------|--------------|--------------|
| Day 1 | 41.06, 49.67 | 56.61, 65.52 | 49.89, 73.71 | 62.59, 76.34 |
| Day 2 | 48.62, 57.76 | 60.02, 72.58 | 61.80, 82.53 | 73.98, 85.44 |
| Day 3 | 57.97, 68.37 | 73.05, 83.76 | 68.67, 88.62 | 79.29, 89.93 |
| Day 4 | 27.65, 37.98 | 31.81, 47.02 | 13.04, 38.57 | 25.73, 38.17 |

*Note.* DLDlow = estimated values for children with DLD and low verbal working memory; DLDav = estimated values for children with DLD and average verbal working memory; TDlow = estimated values for typically developing children with low verbal working memory; TDav = estimated values for typically developing children with average verbal working memory.

**Table S5**

*Confidence Intervals (95%; Upper, Lower) Indicating Between-Group Differences on Recognition*

|       | DLDlow       | DLDav        | TDlow        | TDav         |
|-------|--------------|--------------|--------------|--------------|
| Day 1 | 67.37, 73.04 | 74.71, 81.31 | 75.66, 90.70 | 82.65, 90.40 |
| Day 2 | 69.79, 76.38 | 77.19, 84.93 | 86.44, 95.73 | 90.41, 95.47 |
| Day 3 | 73.78, 80.52 | 81.52, 92.36 | 92.20, 98.54 | 94.47, 97.85 |
| Day 4 | 66.46, 75.47 | 74.81, 86.92 | 86.32, 96.80 | 89.74, 95.36 |

*Note.* DLDlow = estimated values for children with DLD and low verbal working memory; DLDav = estimated values for children with DLD and average verbal working memory; TDlow = estimated values for typically developing children with low verbal working memory; TDav = estimated values for typically developing children with average verbal working memory.
